# Supplementary material for: Identification of SEC61G as a Diagnostic and Prognostic Biomarker in Oral Squamous Cell Carcinoma
Source: MDPI journal article supplement (doi:10.3390/biomedicines11102718), 2023-10-06
Supplement: s1 [file s1]

**Supplementary Table S1.** Gene sets enriched in the high SEC61G expression group.

| Gene set name                                                | NES   | NOM <i>P</i> -value | FDR q-value |
|--------------------------------------------------------------|-------|---------------------|-------------|
| HALLMARK_OXIDATIVE_PHOSPHORYLATION                           | 2.091 | 0.000               | 0.006       |
| HALLMARK_MYC_TARGETS_V1                                      | 1.888 | 0.008               | 0.025       |
| HALLMARK_MYC_TARGETS_V2                                      | 1.875 | 0.010               | 0.019       |
| HALLMARK_DNA_REPAIR                                          | 1.859 | 0.006               | 0.017       |
| KEGG_OXIDATIVE_PHOSPHORYLATION                               | 2.233 | 0.000               | 0.000       |
| KEGG_PARKINSONS_DISEASE                                      | 2.103 | 0.002               | 0.004       |
| KEGG_PROTEASOME                                              | 2.004 | 0.002               | 0.009       |
| KEGG_RIBOSOME                                                | 1.993 | 0.000               | 0.009       |
| KEGG_HUNTINGTONS_DISEASE                                     | 1.970 | 0.006               | 0.009       |
| KEGG_ALZHEIMERS_DISEASE                                      | 1.953 | 0.008               | 0.009       |
| KEGG_PROTEIN_EXPORT                                          | 1.917 | 0.000               | 0.013       |
| NES: normalized enrichment score; FDR: false discovery rate. |       |                     |             |

**Supplementary Table S2.** List of antibodies for flow cytometry.

| Antibody/Fluorophore | Target Species | Company                     | Clone  | Catalog Number |
|----------------------|----------------|-----------------------------|--------|----------------|
| CD45-APC-eFluor 780  | human          | eBioscience, San Diego CA   | HI30   | 47-0459-41     |
| CD3-Alexa Fluor 700  | human          | eBioscience, San Diego CA   | UCHTI  | 56-0038-41     |
| CD3-FITC             | human          | BioLegend, San Diego CA     | OKT3   | 317305         |
| CD8-PE-Cy7           | human          | eBioscience, San Diego CA   | SK1    | 25-0087-42     |
| CD4-FITC             | human          | BD Biosciences, La Jolla CA | RPA-T4 | 561005         |
| CD34-FITC            | human          | BioLegend, San Diego CA     | 561    | 343603         |
| CD5-FITC             | human          | BioLegend, San Diego CA     | L17F12 | 364021         |
| CRT2-PE-Cy7          | human          | BioLegend, San Diego CA     | BM16   | 350117         |
| CD56-PerCP           | human          | BioLegend, San Diego CA     | 5.1H11 | 362525         |
| CD19-FITC            | human          | BioLegend, San Diego CA     | H1B19  | 302205         |
| CD117-BV421          | human          | BioLegend, San Diego CA     | 104D2  | 313215         |

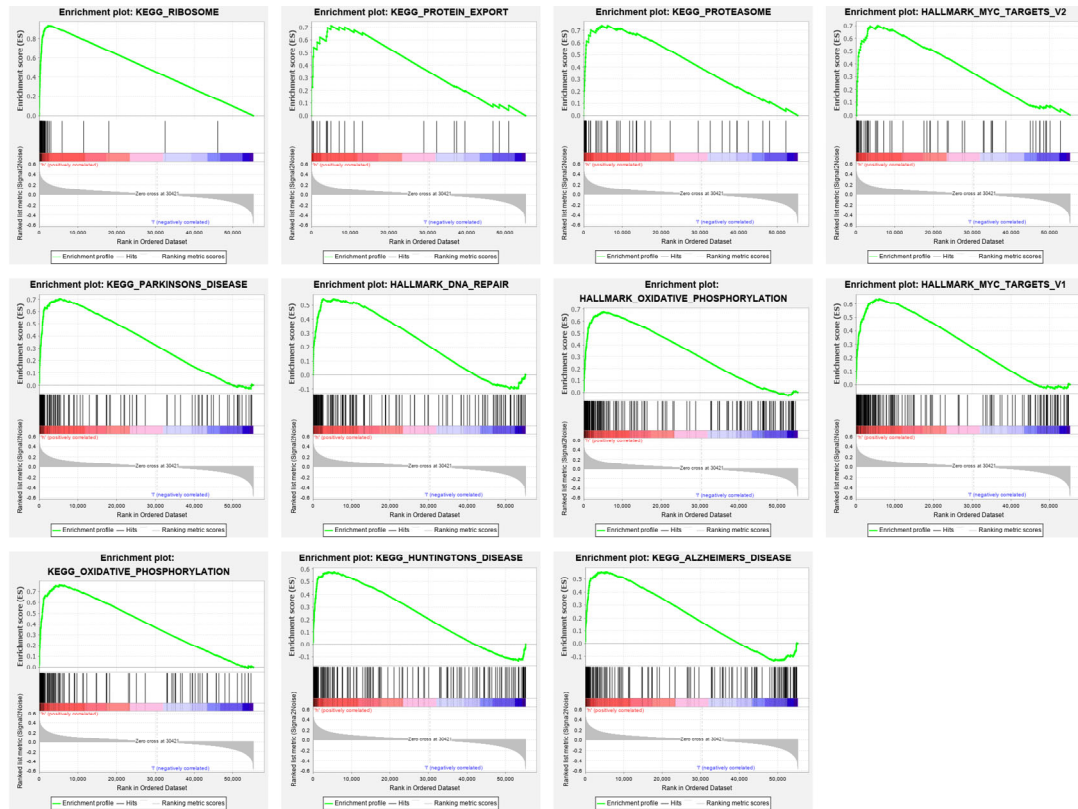

**Supplementary Figure S1.** Enrichment plots from gene set enrichment analysis (GSEA) of SEC61G. GSEA results showing differential enrichment of genes related to oxidative phosphorylation, MYC targets, DNA repair, Parkinson's disease, proteasome, ribosome, Huntington's disease, Alzheimer's disease, and protein export in HNSCC with high SEC61G expression.

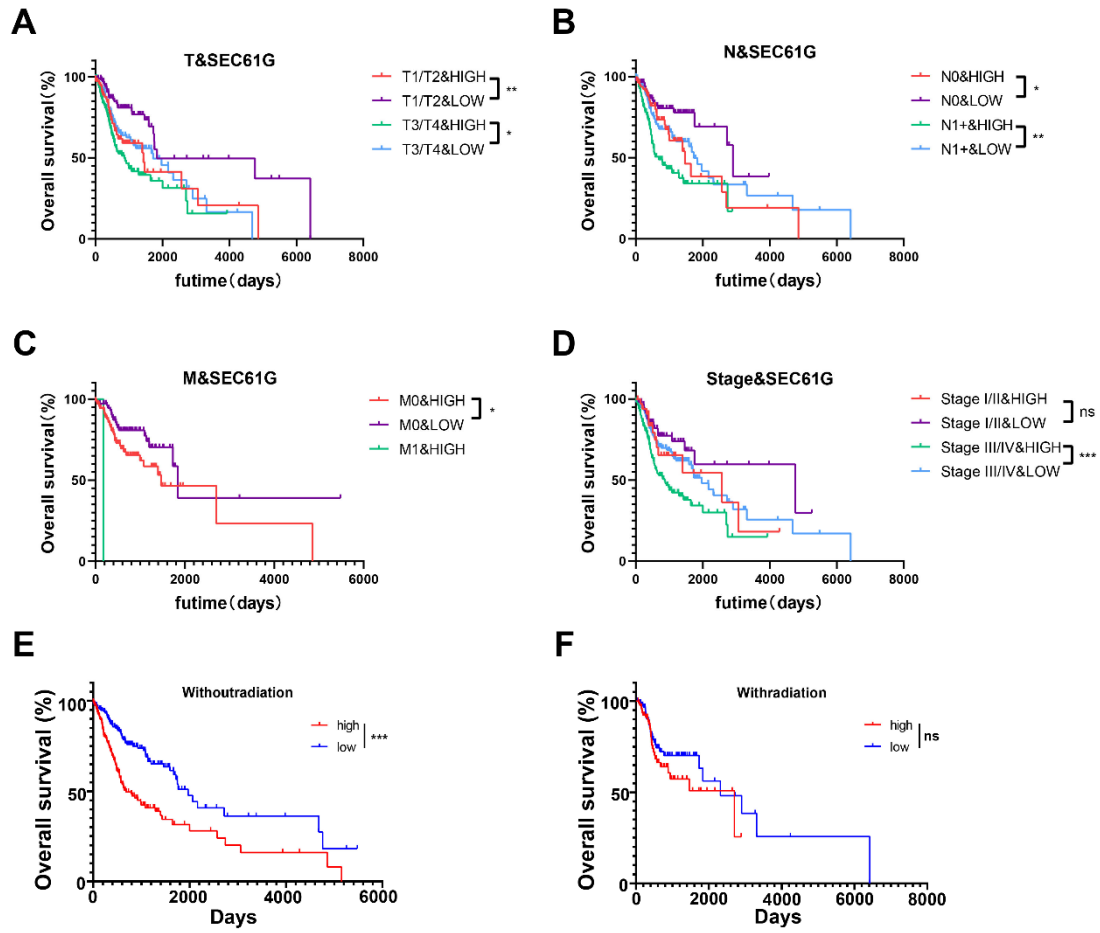

**Supplementary Figure S2.** Kaplan–Meier curves of overall survival (OS) in subgroups HNSCC patients. A. Impact of SEC61G expression and T stage on OS. B. Impact of SEC61G expression and N stage on OS. C. Impact of SEC61G expression and M stage on OS. D. Impact of SEC61G expression and clinical stage on OS. E. The prognostic value of SEC61G expression in patients without radiotherapy. F. The prognostic value of SEC61G expression in patients with radiotherapy. \*,  $P<0.05$ , \*\*,  $P<0.01$ , \*\*\*,  $P<0.001$ , ns, no significance.

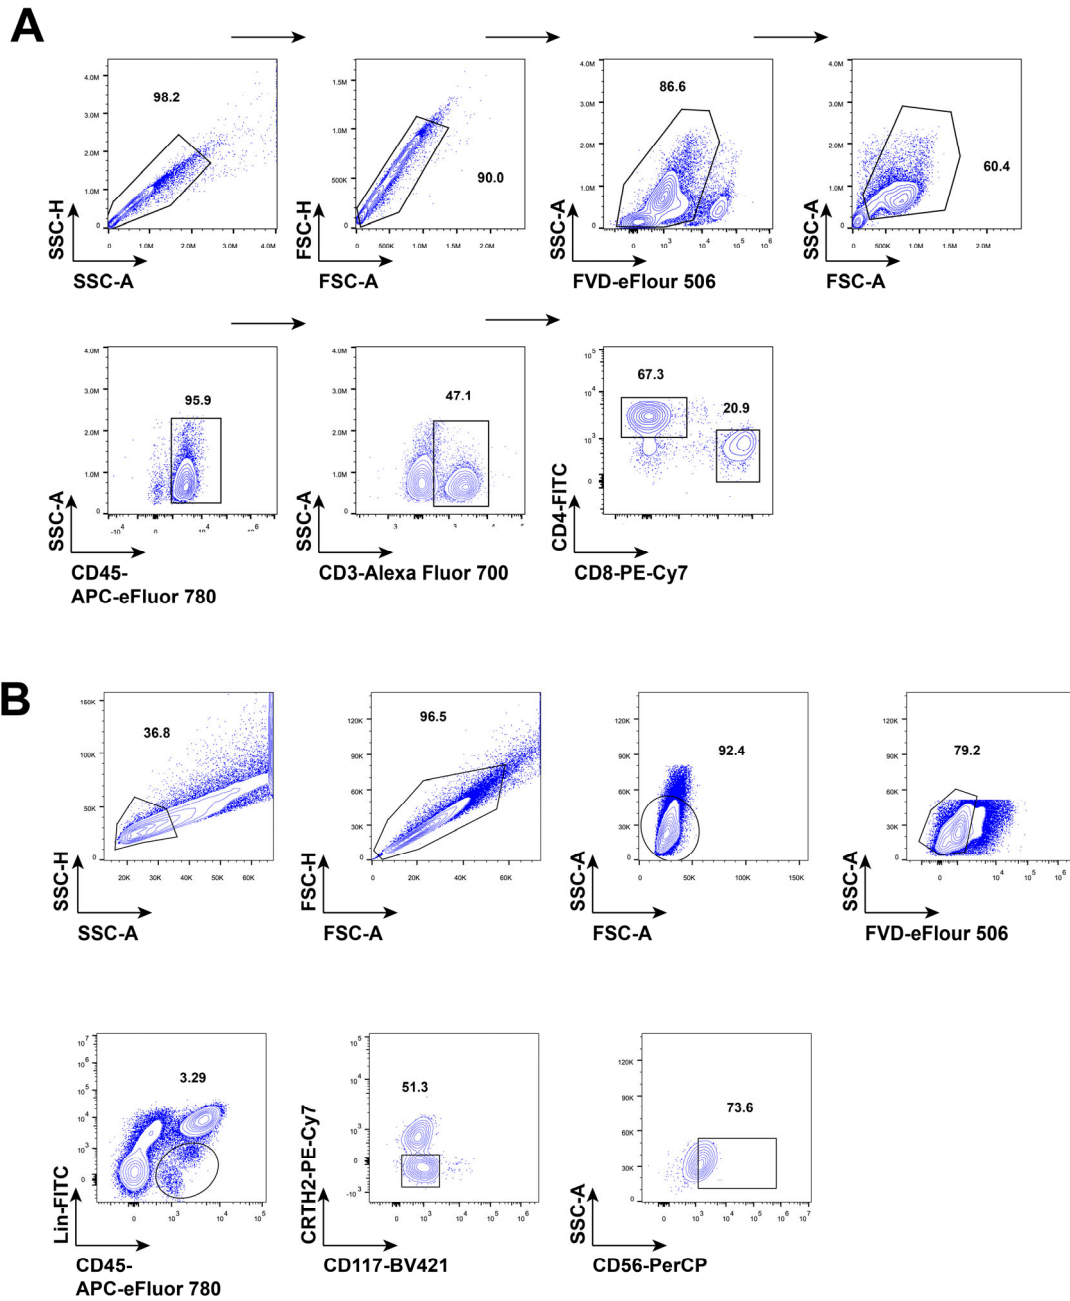

**Supplementary Figure S3.** Gating strategies of immune cells in human OSCC samples. A. Gating strategy of CD4<sup>+</sup> and CD8<sup>+</sup> T cells. B. Gating strategy of NK cells.
